# Supplementary material
Source: PubMed Central journal article supplement (PMC2258895)
Supplement: jbacter_190_6_1985__1.pdf [file jbacter_190_6_1985__1.pdf]

Table S1. Plasmids used in this study

| Plasmid name                                  | Feature(s)                                        | Reference or source |
|-----------------------------------------------|---------------------------------------------------|---------------------|
| <b>LacZ fusions</b>                           |                                                   |                     |
| pOG-R-125                                     | The <i>icmR</i> regulatory region in pGS-lac-02   | (6)                 |
| pOG-icmV-LR2                                  | The <i>icmV</i> regulatory region in pGS-lac-02   | This study          |
| pOG-icmW-LR2                                  | The <i>icmW</i> regulatory region in pGS-lac-02   | This study          |
| pEA-lpg0525-lacZ                              | The <i>lvgA</i> regulatory region in pGS-lac-02   | This study          |
| pGA-sidH-lacZ                                 | The <i>sidH</i> regulatory region in pGS-lac-02   | This study          |
| pMR-sidM-lacZ                                 | The <i>sidM</i> regulatory region in pGS-lac-02   | This study          |
| pGA-lepB-lacZ                                 | The <i>lepB</i> regulatory region in pGS-lac-02   | (5)                 |
| pEA-lpg0038-lacZ                              | The <i>legA10</i> regulatory region in pGS-lac-02 | This study          |
| pEA-lpg0436-lacZ                              | The <i>legA11</i> regulatory region pGS-lac-02    | This study          |
| pEA-lpg0227-lacZ                              | The <i>ceg7</i> regulatory region pGS-lac-02      | This study          |
| pEA-lpg0898-lacZ                              | The <i>ceg18</i> regulatory region pGS-lac-02     | This study          |
| pEA-lpg2591-lacZ                              | The <i>ceg33</i> regulatory region pGS-lac-02     | This study          |
| pEA-lpg0012-lacZ                              | The <i>cegC1</i> regulatory region pGS-lac-02     | This study          |
| pEA-lpg0126-lacZ                              | The <i>cegC2</i> regulatory region pGS-lac-02     | This study          |
| pEA-lpg1144-lacZ                              | The <i>cegC3</i> regulatory region pGS-lac-02     | This study          |
| pEA-lpg2200-lacZ                              | The <i>cegC4</i> regulatory region pGS-lac-02     | This study          |
| <b>LacZ fusions with mutations</b>            |                                                   |                     |
| pOG-V-cb-1                                    | pOG-icmV-LR2 with a mutated CpxR binding site     | This study          |
| pOG-W-cb-1                                    | pOG-icmW-LR2 with a mutated CpxR binding site     | This study          |
| pEA-lpg0525-mut-lacZ                          | pEA-lpg0525-lacZ with a mutated CpxR binding site | This study          |
| pEA-sidH-mut-lacZ                             | pGA-sidH-lacZ with a mutated CpxR binding site    | This study          |
| pEA-sidM-mut-lacZ                             | pMR-sidM-lacZ with a mutated CpxR binding site    | This study          |
| pEA-lpg0898-mut-cpxR-lacZ                     | pEA-lpg0898-lacZ with a mutated CpxR binding site | This study          |
| pEA-lpg0898-mut-pmrA-lacZ                     | pEA-lpg0898-lacZ with a mutated PmrA binding site | This study          |
| pEA-lpg0012-mut-lacZ                          | pEA-lpg0012-lacZ with a mutated CpxR binding site | This study          |
| pEA-lpg0126-mut-lacZ                          | pEA-lpg0126-lacZ with a mutated CpxR binding site | This study          |
| pEA-lpg1144-mut-lacZ                          | pEA-lpg1144-lacZ with a mutated CpxR binding site | This study          |
| pEA-lpg2200-mut-lacZ                          | pEA-lpg2200-lacZ with a mutated CpxR binding site | This study          |
| <b>Plasmid containing IPTG-inducible CpxR</b> |                                                   |                     |
| pEA-puc-CpxR                                  | CpxR in pUC-18                                    | This study          |
| pEA-pTac-CpxR                                 | CpxR under <i>Ptac</i> promoter in pMMB207        | This study          |

|                               |                                           |            |
|-------------------------------|-------------------------------------------|------------|
| pEA-pTac-CpxR-sidM-lacZ       | <i>Ptac</i> -CpxR in pMR-sidM-lacZ        | This study |
| pEA-pTac-CpxR-sidMmut-lacZ    | <i>Ptac</i> -CpxR in pEA-sidM-mut-lacZ    | This study |
| pEA-pTac-CpxR-lpg0525-lacZ    | <i>Ptac</i> -CpxR in pEA-lpg0525-lacZ     | This study |
| pEA-pTac-CpxR-lpg0525mut-lacZ | <i>Ptac</i> -CpxR in pEA-lpg0525-mut-lacZ | This study |

### CyaA fusions

|                     |                                                         |            |
|---------------------|---------------------------------------------------------|------------|
| pEA-lpg0038-cyaA    | C-terminal fusion of <i>legA10</i> to CyaA              | This study |
| pEA-lpg0436-cyaA    | C-terminal fusion of <i>legA11</i> to CyaA              | This study |
| pEA-lpg0227-cyaA    | C-terminal fusion of <i>ceg7</i> to CyaA                | This study |
| pEA-lpg0898-cyaA    | C-terminal fusion of <i>ceg18</i> to CyaA               | This study |
| pEA-lpg2591-cyaA    | C-terminal fusion of <i>ceg33</i> to CyaA               | This study |
| pEA-lpg0012-cyaA    | C-terminal fusion of <i>cegC1</i> to CyaA               | This study |
| pEA-lpg0126-cyaA    | C-terminal fusion of <i>cegC2</i> to CyaA               | This study |
| pEA-lpg1144-cyaA    | C-terminal fusion of <i>cegC3</i> to CyaA               | This study |
| pEA-lpg2200-cyaA    | C-terminal fusion of <i>cegC4</i> to CyaA               | This study |
| pEA-sidM-cyaA       | C-terminal fusion of <i>sidM</i> to CyaA                | This study |
| pEA-RR-lpg2200-cyaA | <i>cyaA-cegC4</i> fusion with the <i>cegC4</i> promoter | This study |
| pEA-RR-sidM-cyaA    | <i>cyaA-sidM</i> fusion with the <i>sidM</i> promoter   | This study |

### Additional plasmids

|             |                                                                                         |        |
|-------------|-----------------------------------------------------------------------------------------|--------|
| pOG-ECP-2   | <i>L. pneumophila</i> CpxR in pET-15b                                                   | (1)    |
| pMMB-cyaA-C | CyaA fusion vector                                                                      | (5)    |
| pRep4       | <i>oriR</i> (p15A) <i>lacI<sup>q</sup></i> , Km <sup>r</sup>                            | QIAGEN |
| pGS-lac-02  | <i>oriV</i> (RSF1010) with a promoterless <i>lacZ</i> gene Cm <sup>r</sup>              | (2)    |
| pMMB207     | <i>oriV</i> (RSF1010) <i>IncQ lacI<sup>q</sup></i> Cm <sup>r</sup> <i>Ptac oriT</i> MCS | (3)    |
| pUC-18      | <i>oriR</i> (colEI) MCS Ap <sup>r</sup>                                                 | (4)    |

---

### References for Table S1

1. Gal-Mor, O., and G. Segal. 2003. Identification of CpxR as a positive regulator of *icm* and *dot* virulence genes of *Legionella pneumophila*. J Bacteriol **185**:4908-4919.
2. Gal-Mor, O., T. Zusman, and G. Segal. 2002. Analysis of DNA regulatory elements required for expression of the *Legionella pneumophila icm* and *dot* virulence genes. J Bacteriol **184**:3823-3833.
3. Morales, V. M., A. Backman, and M. Bagdasarian. 1991. A series of wide-host-range low-copy-number vectors that allow direct screening for recombinants. Gene **97**:39-47.
4. Yanish-Perron, C., J. Viera, and J. Messing. 1985. Improved M13 phage cloning vectors and host strains: nucleotide sequences of the M13mp18 and pUC19 vectors. Gene **33**:103-119.

5. **Zusman, T., G. Aloni, E. Halperin, H. Kotzer, E. Degtyar, M. Feldman, and G. Segal.** 2007. The response regulator PmrA is a major regulator of the icm/dot type IV secretion system in *Legionella pneumophila* and *Coxiella burnetii*. *Mol Microbiol* **63**:1508-1523.
6. **Zusman, T., O. Gal-Mor, and G. Segal.** 2001. Characterization of a *Legionella pneumophila* *relA* insertion mutant and the role of RelA and RpoS in virulence gene expression. *J Bacteriol* **184**:67-75.

Table S2. Primers used in this study

| Gene                                                               | Primer name   | Sequence (5'-3')                     |
|--------------------------------------------------------------------|---------------|--------------------------------------|
| <b>Primers used for construction of LacZ translational fusions</b> |               |                                      |
| <i>icmV</i>                                                        | icmVW-F       | GGGATCCCCTGATCCTGATTTCTTTTTCATATT    |
|                                                                    | icmW-R-long   | CGGCGAATTCAGCAAACGTAAGCCTCTTCCTG     |
| <i>icmW</i>                                                        | icmVW-R       | GGGATCCCCTTCATGGCTTAAATCAGGCAT       |
|                                                                    | icmV-F-long   | GCCGGAATTCGTATCATAAAAGCAGCGACAACC    |
| <i>lvgA</i>                                                        | lpg0525-BamHI | GTGCGGATCCATTTTCGATATCGCCGTCTGCCAT   |
|                                                                    | lpg0525-EcoRI | GAGCGAATTCCTACACTCCGCTTTTGTGTTG      |
| <i>sidH</i>                                                        | sidH-BamHI    | GAGCGGATCCCCGGTTTCAATGGTTCTTTTCAT    |
|                                                                    | sidH-EcoRI    | GACGGAATTCATAATTTTTACCGCAAACGC       |
| <i>sidM</i>                                                        | sidM-BamHI    | GACCGGATCCCCCTTGCTCTTCATTAACACTCATT  |
|                                                                    | sidM-EcoRI    | GAGCGAATTCTGTACAAAGAGGCTGGATGC       |
| <i>legA10</i>                                                      | lpg0038-BamHI | GTGCGGATCCCCATGGGGAATTGTTGCGGCCA     |
|                                                                    | lpg0038-EcoRI | GACGGAATTCAGCAAAGGACATACTATCGCC      |
| <i>legA11</i>                                                      | lpg0436-BamHI | GACCGGATCCCCCTTTCATTTCACTTCTACCCATTT |
|                                                                    | lpg0436-EcoRI | GCACGAATTCTCAGTCGTTTCCTTCGAAG        |
| <i>ceg7</i>                                                        | lpg0227-BamHI | ACCGGATCCCCATTATCTATTGAATATGACATCTG  |
|                                                                    | lpg0227-EcoRI | GCAGGAATTCTTTTATGAAGGTGATAGCACG      |
| <i>ceg18</i>                                                       | lpg0898-BamHI | GTGCGGATCCCCCGAAACAGCAGATAATATTGACAT |
|                                                                    | lpg0898-EcoRI | GAGCGAATTCCTGCGCCTAGCGAAGAAC         |
| <i>ceg33</i>                                                       | lpg2591-BamHI | GTGCGGATCCCCTGGATCTAATTGCGCGGCCAT    |
|                                                                    | lpg2591-EcoRI | GAGCGAATTCGCAGCAGGTTGCACACCATC       |
| <i>cegC1</i>                                                       | lpg0012-BamHI | GTGCGGATCCCCTGTATGTTCCGTTGTGTTTCAT   |
|                                                                    | lpg0012-EcoRI | GAGCGAATTCGCGGAGATAATCCAATG          |
| <i>cegC2</i>                                                       | lpg0126-BamHI | GTGCGGATCCCCAGTTGGGAACAAAGGTGTCAT    |
|                                                                    | lpg0126-EcoRI | GAGCGAATTCGTGAATTGGGCTTTGCACAG       |
| <i>cegC3</i>                                                       | lpg1144-BamHI | GTGCGGATCCCCAGCGGGGGGGTTAAAGGCAT     |
|                                                                    | lpg1144-EcoRI | GAGCGAATTCGAATCGATGATCTGGAATCAGCC    |
| <i>cegC4</i>                                                       | lpg2200-BamHI | GACCGGATCCCCCTCTTTTGTGTTTGCCTCATT    |

lpg2200-EcoRI GCACGAATTCGAAATGGAACGGGAAAGACA

### Primers used for site-directed mutagenesis

|              |                    |                                           |
|--------------|--------------------|-------------------------------------------|
| <i>icmV</i>  | VCB-1F             | AAAAGATGAAATAATGCCTGATTTAAGCCATG          |
|              | VCB-1R             | CAGGCATTATTTTCATCTTTTTTTACTGAGATACGTT     |
| <i>icmW</i>  | WCB-F              | CATATTTTTTCATTTTTTCACAATTTTAAGTAATGG      |
|              | WCB-R              | GTGAAAAATGAAAAAATATGAAAAAGAAATCAGGATCAAGG |
| <i>lvgA</i>  | lvgA-mut-F         | CGGCTTTTTTCACTTTTCTTAAGCTCTGTTTAATG       |
|              | lvgA-mut-R         | AGAAAAGTGAAAAAAGCCGTAAAATCAATG            |
| <i>sidH</i>  | SidH-mut-F         | TCAAAGTGAATGAAATTTTGAGAGAAAAAACCCT        |
|              | SidH-mut-R         | CTCAAATTTTCATTCACCTTTGAATCAATATTGCGC      |
| <i>sidM</i>  | sidM-mut-F         | GTGTAAATTTGAAATTATATGTAAAGACAATATCC       |
|              | sidM-mut-R         | ACATATAATTTCAAATTTACACATCTAATACACAA       |
| <i>ceg18</i> | lpg0898-CpxR-mut-F | TTTTAATTTCAATTTTTTTGTAAAGAAATATTTCA       |
|              | lpg0898-CpxR-mut-R | CAAAAAAATTGAAATTAAGTAATTGTTTCATTAT        |
|              | lpg0898-Pmra-mut-F | AACAATTCCTATATGTTCACTTAATGTTCTCTTCT       |
|              | lpg0898-Pmra-mut-R | AAGTGAACATATAGGAATTGTTAAGATTGAAATAT       |
| <i>cegC1</i> | lpg0012-mut-F      | TCTTAATTCACAATTAATTACTGTCTTATATTAAG       |
|              | lpg0012-mut-R      | CAGTAATTAATTGTGAATTAAGATGAAAGCAATGG       |
| <i>cegC2</i> | lpg0126-mut-F      | CCGATTGATTCAAGACCATTTTTTTAATGATTATCC      |
|              | lpg0126-mut-R      | AAAATGGTCTTGAATCAATCGAGAAACCAAACCC        |
| <i>cegC3</i> | lpg1144-mut-F      | CCAAGCTCTTGAAATTAATTGTAAACTTGACGC         |
|              | lpg1144-mut-R      | AATTAATTTCAAGAGCTTGGTAGAGTAATTA           |
| <i>cegC4</i> | lpg2200-mut-F      | CTTATAATTTGAAGGAATTTGTAAAAAAATGAAC        |
|              | lpg2200-mut-R      | ACAAATTCCTTCAAATTATAAGCTGCTCCTTTTAC       |

### Primers used for RT PCR

|               |              |                               |
|---------------|--------------|-------------------------------|
| <i>icmV</i>   | icmV-RT-F    | CCTCAGGAACCAACCCATATCGAATC    |
|               | icmV-RT-R    | CAATGCGATCATAACCACAACCAAGC    |
| <i>sidM</i>   | SidM-RT-F    | GCAGACCCAACCTTCGAAAATATGGATGC |
|               | SidM-RT-R    | GCCGTATAGCGGTGCTCTCTTC        |
| <i>legA11</i> | lpg0436-RT-F | GGGTGGTTTGGAAAGCTGTTTCTTCTA   |
|               | lpg0436-RT-R | CAGTAGAGCCATGGATGGTTGGAGC     |
| <i>ceg7</i>   | lpg0227-RT-F | CAGCACACCCAGTAAGCGAGC         |
|               | lpg0227-RT-R | CCCGTTTGCCTTTACCAAAAACG       |
| <i>ceg33</i>  | Lpg2591-RT-F | TTGCAATCAGCTGCCCAAGGTTGC      |
|               | Lpg2591-RT-R | TTAACTCTTCAGCGAAGTCGGGAT      |
| <i>cegC1</i>  | Lpg0012-RT-F | CGAGTAACATCAGGAGCAGCCAG       |

|       |              |                           |
|-------|--------------|---------------------------|
|       | Lpg0012-RT-R | GCCTGAGCCAATGGAGCTGGAG    |
| cegC2 | lpg0126-RT-F | TCCGATAAGTTTTAGCAGGTGCCAA |
|       | lpg0126-RT-R | GCAGCGATTTGGTCAGTAATACGC  |
| sidF  | sidF-RT-F    | AGGTCTCGGGCTTGGGTTAC      |
|       | sidF-RT-R    | CATACCCTCGCGAACAATGG      |
| sdeB  | sdeB-RT-F    | CGCAATGAAAAAATTCGCATGC    |
|       | sdeB-RT-R    | GAGGGTTCGGTAGATCCAGCA     |

**Primers used for gel mobility shift assay**

|       |               |                                   |
|-------|---------------|-----------------------------------|
| sidM  | sidM-GS-F     | GTGTAATAATCGAACGCATCG             |
|       | sidM-GS-R     | CCTCGAGTACATGAGCATAATG            |
| lvgA  | lvgA-GS-F     | GATTTGAGTACTTAAATTTGCCTC          |
|       | lpg0525-BamHI | GTGCGGATCCATTTCGATATCGCCGTCTGCCAT |
| cegC2 | lpg0126-GS-F  | TGTGCAAGCGTTTTCTTCTGTG            |
|       | lpg0126-BamHI | GTGCGGATCCCCAGTTGGGAACAAAGGTGTCAT |

**Primers used for construction of *Ptac-cpxR***

|      |            |                                     |
|------|------------|-------------------------------------|
| cpxR | CpxR-EcoRI | GAGCGAATTCATGAGCAGCTCTATTCTCATTATTG |
|      | CpxR-pET-R | CCGGATCCTACAGACTACGCATTAAACATG      |

**Primers used for construction of *CyaA* fusions**

|        |                |                                     |
|--------|----------------|-------------------------------------|
| legA10 | lpg0038-cyaA-F | GATATCTAGAAATGGCCGCAACAATTCCCCA     |
|        | lpg0038-cyaA-R | TCTCCTGCAGAAATTGCTAGTTGTAAGTGGG     |
| legA11 | lpg0436-cyaA-F | GAGAGAATTCGGTGATTAATAATGGGTAGAAGTG  |
|        | lpg0436-cyaA-R | GAGCGGATCCGGTGCTTCTTGACGACTTAA      |
| ceg7   | lpg0227-cyaA-F | GAGAGAATTCGATGTCATATTCAATAGATAATCCT |
|        | lpg0227-cyaA-R | GAGCGGATCCCTGATGCATATTGAGTTCCC      |
| ceg18  | lpg0898-cyaA-F | GAGCGAATTCGATGTCAATATTATCTGCTGTTTCG |
|        | lpg0898-cyaA-R | GACCGGATCCAAGGAGTTTATGAATGTGTT      |
| ceg33  | lpg2591-cyaA-F | GAGAGGATCCTATGGCCGCGCAATTAGATCC     |
|        | lpg2591-cyaA-R | GAGCCTGCAGTCTGACCACAAAGAAAAACC      |
| cegC1  | lpg0012-cyaA-F | GAGCGAATTCGATGAACACAACGGAACATAC     |
|        | lpg0012-cyaA-R | GACCGGATCCTTAAATAGTAACAATAGGCCAC    |
| cegC2  | lpg0126-cyaA-F | GAGCGGTACCCATGACACCTTTGTTCCCAAC     |
|        | lpg0126-cyaA-R | GACCGGATCCTGAAGCCTGACAACCAGTTC      |
| cegC3  | lpg1144-cyaA-F | GAGAGAATTCGATGCCTTTAACCCCCCCCCG     |
|        | lpg1144-cya-R  | GAGCGGATCCCAGGTAAATACGGGGTGTCC      |
| cegC4  | lpg2200-cyaA-F | GAGAGAATTCGATGAGTGCAAAAACAAAAAGA    |

|             |                 |                                     |
|-------------|-----------------|-------------------------------------|
|             | lpg2200-cyaA-R  | GAGCGGATCCTGATTATCGGCACTAAATCC      |
| <i>sidM</i> | sidM-cyaA-EcoRI | GAGAGAATTCGATGAGTGTTAATGAAGAGCAATTT |
|             | sidM-cyaA-BamHI | GACCGGATCCATAATTGAAATGCGCTGGT       |

**Primers used for the construction of CyaA fusions under their natural promoter**

|              |              |                                  |
|--------------|--------------|----------------------------------|
| <i>cegC4</i> | lpg2200-ApaI | GAGAGGGCCCGAAATGGAACGGGAAAGACA   |
|              | lpg2200-NdeI | GCACCATATGAGATATCTCCTCGCACTTGTTG |
| <i>sidM</i>  | sidM-ApaI    | GAGAGGGCCCTGTACAAAGAGGCTGGATGC   |
|              | sidM-NdeI    | GCACCATATGAATTCTCCCCATTATGCTCAT  |

---
